# Supplementary material for: Metal-induced gelation in dipyridyl ureas
Source: Royal Society of Chemistry journal article supplement (doi:10.1039/c0nj00278j), 2010-01-01
Supplement: c0nj00278j.pdf [file c0nj00278j.pdf]

### Supplementary Data

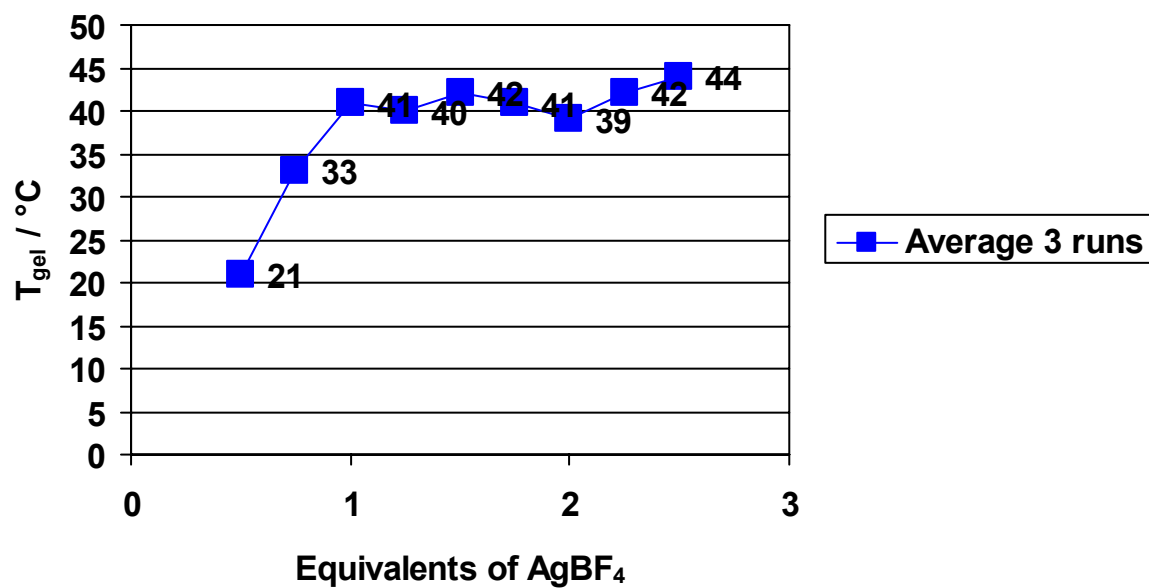

Figure S1  $T_{\text{gel}}$  measurements as a function of increasing  $\text{AgBF}_4$  concentration for  $\text{L}^{10}$ . The apparatus for this work is shown in Figure S2.

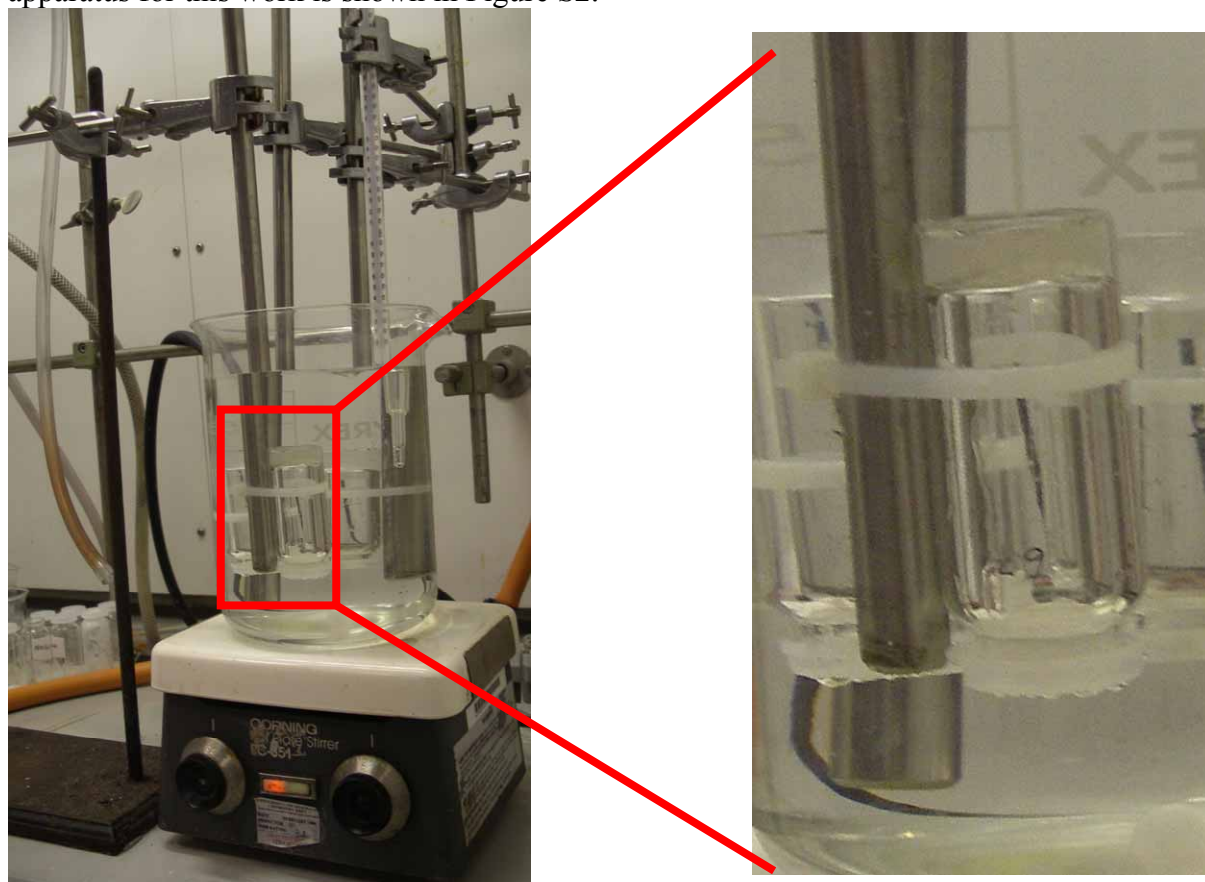

Figure S2 apparatus for  $T_{\text{gel}}$  measurements

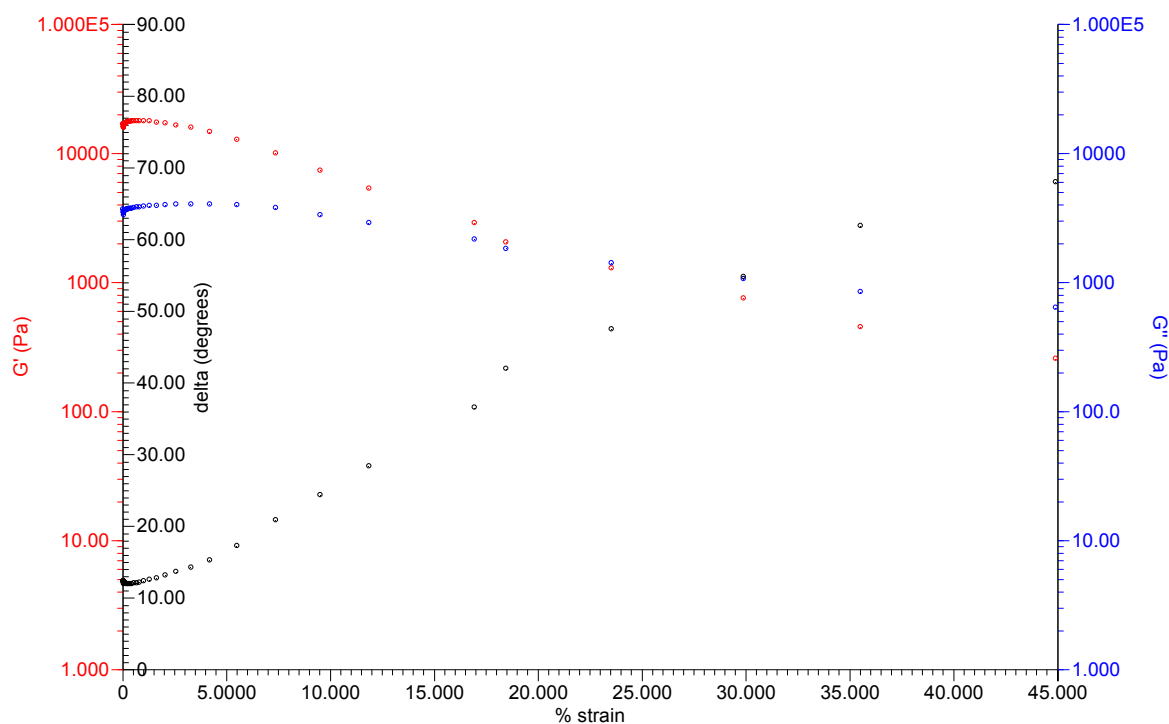

Figure S3 Strain sweep rheometry for a 1:1 mixture of  $\text{AgNO}_3$  and  $\text{L}^{10}$  in thf / water 3:2 1 wt. %.

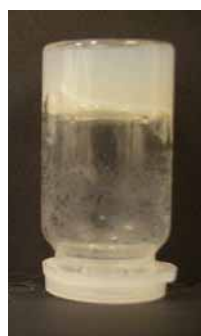

Figure S4 metallogel formed from  $\text{L}^{13}$  and silver(I) nitrate (1:1) in water / THF (3:2) at a concentration of 1 % w/v.

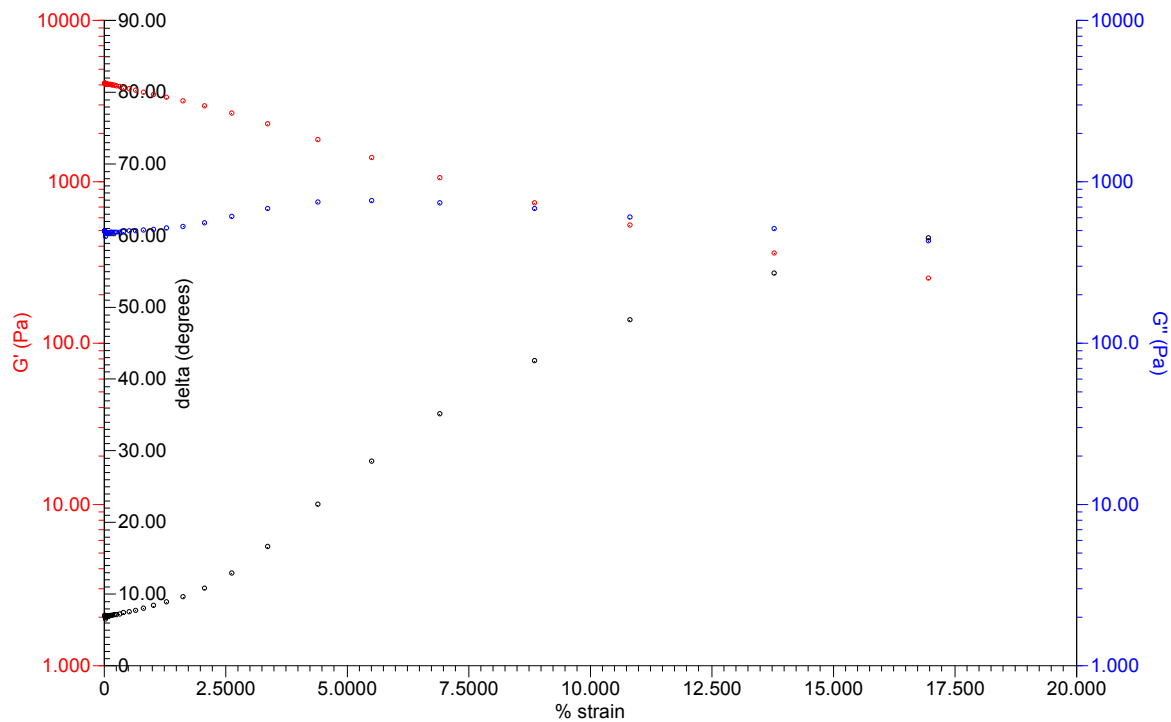

Figure S5 stress sweep rheometry for the metallogel shown in figure S4
